## Correction: The role of AP-1 in self-sufficient proliferation and migration of cancer cells and its potential impact on an autocrine/paracrine loop

**Sherif Abd El-Fattah Ibrahim<sup>1,2,\*</sup>, Aierken Abudu<sup>1,\*</sup>, Eugenia Johnson<sup>1</sup>, Neelum Aftab<sup>1</sup>, Susan Conrad<sup>1</sup> and Michele Fluck<sup>1</sup>**

<sup>1</sup> Department of Microbiology and Molecular Genetics, Michigan State University, East Lansing, MI, USA

<sup>2</sup> Department of Histology and Cell Biology, Faculty of Medicine, Mansoura University, Mansoura, Egypt

\* These authors have contributed equally to this work

**Published:** January 22, 2019

**Copyright:** Ibrahim et al. This is an open-access article distributed under the terms of the Creative Commons Attribution License 3.0 (CC BY 3.0), which permits unrestricted use, distribution, and reproduction in any medium, provided the original author and source are credited.

**This article has been corrected:** The correct Author name is given below:

**Eugenia Johnson**

Original article: Oncotarget. 2018; 9:34259-34278. <https://doi.org/10.18632/oncotarget.26047>
